# Supplementary material
Source: PubMed Central journal article supplement (PMC4743824)
Supplement: pnas.1502556112.sapp.pdf [file pnas.1502556112.sapp.pdf]

**Fig. S1:** Overview of methodology for the systematic review.

Step 1: Literature search

Search of English-language literature containing "rewilding OR rewilding" on WoS and Scopus until December 2014  
WoS (n=116)  
Scopus (n=112)

Step 2: Filtering

Removal of duplicates, books, book reviews, conference abstracts, editorials, and irrelevant literature according to rewilding criteria (n=69)

Step 3: Google Scholar Expansion and filtering

Expanding literature lists from Google Scholar by screening citations from the 10 most cited publications from the databases and removing irrelevant literature according to rewilding criteria (n=22)

Step 4: Included

Included in subsequent data analysis:  
WoS and Scopus (n=69)  
Google Scholar (22)  
In total: (n=91)

1. Attitude ("Pro", "Con", and "Neutral") towards rewilding with species extirpated <5000 years ago, species extirpated >5000 years ago, and ecological replacements.

2. Literature categories: "Essay or Opinion piece", "Experiment", "Review", and "Non-experimental empirical".

3. Geographic focus of paragraphs concerning rewilding.

4. Rewilding initiatives referred to or reported in the rewilding literature that fulfills the rewilding criteria (country-level if possible).

5. Species used in rewilding projects or suggested as rewilding candidates were categorized into organism groups ("Carnivorous mammals", "Herbivorous mammals", "Omnivorous mammals", "Reptiles", "Birds", and "Invertebrates"), introduction geography ("Range restricted," "Extirpated <5000 years ago", "Extirpated >5000 years ago", "Ecological replacement", and "Novel function"), body mass ("0-9kg", "10-49kg", "50-99 kg", "100-499kg", "500-999kg", "≥1000kg"), and times since disappearance ("Partly present", "0-99 years ago", "100-499 years ago", "500-1.999 years ago", "2.000-4.999 years ago", ">5000 years ago", and "Never present").

Step 6: Scoring

1. Attitude  
2. Literature category  
3. Geographic focus  
4. Rewilding projects  
5. Species used in rewilding projects or suggested as rewilding candidates

Step 5: Data extraction

**Table S1:** Characteristics of the articles used in the systematic review (n=91). Characteristics include our assessment of the authors' attitude (neutral, positive, negative, and NA (not available)) towards trophic rewilding (separately considering reintroductions of extant species that have been extirpated from the focal zoogeographical region within the last 5000 years, reintroductions of extant species that have been extirpated from a given region >5000 years ago, and introductions of ecological replacements for a globally extinct species), literature categories (essay or opinion, review, experiment, non-experimental empirical), and geographical focus of rewilding section in the publication.

| No. | Publication                                                                                                                                                                                | Source         | Attitude                   |                            |                        | Literature categories | Geographic focus      |
|-----|--------------------------------------------------------------------------------------------------------------------------------------------------------------------------------------------|----------------|----------------------------|----------------------------|------------------------|-----------------------|-----------------------|
|     |                                                                                                                                                                                            |                | Extirpated <5000 years ago | Extirpated >5000 years ago | Ecological replacement |                       |                       |
| 1   | Aslan CE, Zavaleta ES, Croll DON & Tershy B (2012) Effects of native and non-native vertebrate mutualists on plants. <i>Conservation Biology</i> 26(5):778-789.                            | Google Scholar | NA                         | NA                         | Pro                    | Essay/Opinion         | Whole world           |
| 2   | Biello D (2011) Tortoises to the rescue. Rewilding islands and even continents could prove an effective method for reversing ecological catastrophe. <i>Scientific American</i> 305(1):16. | WoS/Scopus     | Pro                        | NA                         | Pro                    | Essay/Opinion         | Many different places |
| 3   | Bowman D (2012) Conservation: Bring elephants to Australia? <i>Nature</i> 482(7383):30-30.                                                                                                 | Google Scholar | NA                         | NA                         | Pro                    | Essay/Opinion         | Australia             |
| 4   | Brown C, McMorran R & Price MF (2011) Rewilding - A new paradigm for nature conservation in Scotland? <i>Scottish Geographical Journal</i> 127(4):288-314.                                 | WoS/Scopus     | Pro                        | NA                         | NA                     | Essay/Opinion         | Europe (Scotland)     |

|    |                                                                                                                                                                                 |                |         |         |         |               |                             |
|----|---------------------------------------------------------------------------------------------------------------------------------------------------------------------------------|----------------|---------|---------|---------|---------------|-----------------------------|
| 5  | Buck HJ (2015) On the possibilities of a charming Anthropocene. <i>Annals of the Association of American Geographers</i> 105(2):369-377. <sup>1</sup>                           | WoS/Scopus     | Neutral | Neutral | Neutral | Review        | North America (plus Europe) |
| 6  | Burney DA & Burney LP (2007) Paleocology and “inter-situ” restoration on Kaua’i, Hawai’i. <i>Frontiers in Ecology and the Environment</i> 5(9):483-490.                         | Google Scholar | Pro     | Pro     | Pro     | Essay/Opinion | Hawaii                      |
| 7  | Cajal JL & Tonni EP (2006) Re-wilding in South America: Is it possible? <i>Mastozoologia Neotropical</i> 13:281-282.                                                            | WoS/Scopus     | NA      | NA      | Neutral | Essay/Opinion | South America (Argentina)   |
| 8  | Caro T (2007) The Pleistocene re-wilding gambit. <i>Trends in Ecology and Evolution</i> 22(6):281-283.                                                                          | WoS/Scopus     | Neutral | Neutral | Neutral | Review        | North America               |
| 9  | Caro T & Sherman, P (2009) Rewilding can cause rather than solve ecological problems. <i>Nature</i> 462:985.                                                                    | WoS/Scopus     | Pro     | NA      | Con     | Essay/Opinion | North America               |
| 10 | Chapron G (2005) Re-wilding: Other projects help carnivores stay wild. <i>Nature</i> 437(7057):318.                                                                             | WoS/Scopus     | NA      | NA      | Neutral | Essay/Opinion | Africa, Asia                |
| 11 | Corlett RT (2013) The shifted baseline: Prehistoric defaunation in the tropics and its consequences for biodiversity conservation. <i>Biological Conservation</i> 163(1): 13-2. | WoS/Scopus     | Pro     | Pro     | Pro     | Review        | Lowland tropics             |

---

<sup>1</sup> This article was Early View in 2014

|    |                                                                                                                                                                                         |                |         |         |         |               |                                  |
|----|-----------------------------------------------------------------------------------------------------------------------------------------------------------------------------------------|----------------|---------|---------|---------|---------------|----------------------------------|
| 12 | Chrulew M (2011) Reversing extinction: restoration and resurrection in the Pleistocene rewilding projects. <i>Humanimalia</i> 2(2):4-27                                                 | WoS/Scopus     | Neutral | Neutral | Neutral | Essay/Opinion | Siberia                          |
| 13 | Dinerstein E & Irvin WR (2005) Re-wilding: No need for exotics as natives return. <i>Nature</i> 437: 476.                                                                               | WoS/Scopus     | Pro     | NA      | Con     | Essay/Opinion | North America                    |
| 14 | Donlan J, et al. (2005) Re-wilding North America. <i>Nature</i> 436:913-914.                                                                                                            | WoS/Scopus     | NA      | Pro     | Pro     | Essay/Opinion | North America                    |
| 15 | Donlan CJ, et al. (2006) Pleistocene rewilding: an optimistic agenda for twenty-first century conservation. <i>American Naturalist</i> 168(5):660-681.                                  | WoS/Scopus     | NA      | Pro     | Pro     | Essay/Opinion | North America (plus whole world) |
| 16 | Downer CC (2014) The horse and burro as positively contributing returned natives in North America. <i>American Journal of Life Sciences</i> 2(1):5-23.                                  | Google Scholar | Pro     | Pro     | NA      | Essay/Opinion | North America                    |
| 17 | Driscoll CA, et al. (2012) A postulate for tiger recovery: the case of the Caspian Tiger. <i>Journal of Threatened Taxa</i> 4(6):2637–2643.                                             | Google Scholar | Pro     | NA      | NA      | Essay/Opinion | Central and East Asia            |
| 18 | Edwards T, et al. (2014) Genetic assessments and parentage analysis of captive Bolson tortoises ( <i>Gopherus flavomarginatus</i> ) inform their "rewilding" in New Mexico. <i>PLoS</i> | WoS/Scopus     | NA      | Pro     | NA      | Experiment    | North America (New Mexico)       |

|    |                                                                                                                                                                                                                                  |                |     |    |     |               |                          |                          |
|----|----------------------------------------------------------------------------------------------------------------------------------------------------------------------------------------------------------------------------------|----------------|-----|----|-----|---------------|--------------------------|--------------------------|
|    |                                                                                                                                                                                                                                  |                |     |    |     |               |                          | <i>One</i> 9(7):e102787. |
| 19 | Estrada A (2014) Reintroduction of the scarlet macaw ( <i>Ara macao cyanoptera</i> ) in the tropical rainforests of Palenque, Mexico: project design and first year progress. <i>Tropical Conservation Science</i> 7(3):342-364. | WoS/Scopus     | Pro | NA | NA  | Experiment    | Central America (Mexico) |                          |
| 20 | Featherstone A, (2004) Rewilding in the north-central Highlands - An update. <i>Ecos</i> 25(3-4):4-10.                                                                                                                           | WoS/Scopus     | Pro | NA | NA  | Essay/Opinion | Scotland                 |                          |
| 21 | Foreman D (1999) The wildlands project and the rewilding of North America. <i>Denver University Law Review</i> 76:535-553.                                                                                                       | WoS/Scopus     | Pro | NA | NA  | Review        | North America            |                          |
| 22 | Fredrickson EL, Estell RE, Laliberte A & Anderson DM (2006). Mesquite recruitment in the Chihuahuan Desert: historic and prehistoric patterns with long-term impacts. <i>Journal of Arid Environments</i> 65(2):285-295.         | Google Scholar | NA  | NA | Pro | Essay/Opinion | North America            |                          |
| 23 | Fuhlendorf SD, Engle DM, Kerby J & Hamilton R (2009) Pyric herbivory: Rewilding landscapes through the recoupling of fire and grazing. <i>Conservation Biology</i> 23(3):588-598.                                                | WoS/Scopus     | Pro | NA | Pro | Essay/Opinion | North America            |                          |
| 24 | Gerlach J, Rocamora G, Gane J, Jolliffe K & Vanherck L (2013) Giant tortoise distribution and abundance in the Seychelles                                                                                                        | Google Scholar | NA  | NA | Pro | Review        | Seychelles               |                          |

Islands: Past, present, and future.  
*Chelonian Conservation and Biology* 12(1):70-83.

- |    |                                                                                                                                                                                                               |                |    |    |     |               |                   |
|----|---------------------------------------------------------------------------------------------------------------------------------------------------------------------------------------------------------------|----------------|----|----|-----|---------------|-------------------|
| 25 | Gibbs JP, Hunter EA, Shoemaker KT, Tapia WH & Cayot LJ (2014) Demographic outcomes and ecosystem implications of giant tortoise reintroduction to Española Island, Galapagos. <i>PLoS One</i> 9(11): e114048. | Google Scholar | NA | NA | Pro | Experiment    | Galapagos         |
| 26 | Griffiths CJ, et al. (2010) The use of extant non-indigenous tortoises as a restoration tool to replace extinct ecosystem engineers. <i>Restoration Ecology</i> 18(1):1-7.                                    | WoS/Scopus     | NA | NA | Pro | Essay/Opinion | Mascarene islands |
| 27 | Griffiths CJ, Hansen DM, Jones CG, Zuel N & Harris S (2011) Resurrecting extinct interactions with extant substitutes. <i>Current Biology</i> 21(9):762-765.                                                  | WoS/Scopus     | NA | NA | Pro | Experiment    | Mascarene islands |
| 28 | Griffiths CJ, et al. (2012) The welfare implications of using exotic tortoises as ecological replacements. <i>PLoS One</i> 7(6):e39395.                                                                       | Google Scholar | NA | NA | Pro | Experiment    | Mascarene islands |
| 29 | Griffiths CJ, ZuëL N, Jones CG, Ahamud Z & Harris S (2013) Assessing the potential to restore historic grazing ecosystems with tortoise ecological replacements. <i>Conservation Biology</i> 27(4):690-700.   | WoS/Scopus     | NA | NA | Pro | Experiment    | Mascarene islands |

|    |                                                                                                                                                                                                             |            |         |    |     |                            |                   |
|----|-------------------------------------------------------------------------------------------------------------------------------------------------------------------------------------------------------------|------------|---------|----|-----|----------------------------|-------------------|
| 30 | Guilherme JL & Pereira MH (2013) Adaptation of bird communities to farmland abandonment in a mountain landscape. <i>PLoS One</i> 8(9):e73619.                                                               | WoS/Scopus | NA      | NA | NA  | Non-experimental empirical | Europe (Portugal) |
| 31 | Götmark F (2013) Habitat management alternatives for conservation forests in the temperate zone: Review, synthesis, and implications. <i>Forest Ecology and Management</i> 306:292-307.                     | WoS/Scopus | Pro     | NA | NA  | Essay/Opinion              | Temperate zone    |
| 32 | Hansen DM, Kaiser CN & Muller CB (2008) Seed dispersal and establishment of endangered plants on Oceanic Islands: the Janzen-Connell model, and the use of ecological analogues. <i>PLoS One</i> 3(5):e2111 | WoS/Scopus | NA      | NA | Pro | Experiment                 | Mascarene islands |
| 33 | Hansen DM, Donlan CJ, Griffiths CJ & Campbell KJ (2010) Ecological history and latent conservation potential: large and giant tortoises as a model for taxon substitutions. <i>Ecography</i> 33(2):272-284. | WoS/Scopus | NA      | NA | Pro | Review                     | Mascarene islands |
| 34 | Hayward MW & Marlow N (2014) Will dingoes really conserve wildlife and can our methods tell? <i>Journal of Applied Ecology</i> 51(4):835-838.                                                               | WoS/Scopus | Pro     | NA | NA  | Essay/Opinion              | Australia         |
| 35 | Hearn R, Watkins, C & Balzaretto R (2014) The cultural and land use                                                                                                                                         | WoS/Scopus | Neutral | NA | NA  | Essay/Opinion              | Europe (Italy)    |



implications of the reappearance of the wild boar in North West Italy: A case study of the Val di Vara. *Journal of Rural Studies* 36:52-63.

|    |                                                                                                                                                                                                                         |                |     |     |     |                            |                  |
|----|-------------------------------------------------------------------------------------------------------------------------------------------------------------------------------------------------------------------------|----------------|-----|-----|-----|----------------------------|------------------|
| 36 | Hintz, J. (2007) Some political problems for rewilding nature. <i>Ethics, Place and Environment</i> 10(2):177-216.                                                                                                      | WoS/Scopus     | Pro | NA  | NA  | Essay/Opinion              | North America    |
| 37 | Hunter EA, Gibbs JP, Cayot LJ & Tapia W (2013) Equivalency of Galápagos giant tortoises used as ecological replacement species to restore ecosystem functions. <i>Conservation Biology</i> 27(4):701-709.               | Google Scholar | NA  | NA  | Pro | Experiment                 | Galapagos        |
| 38 | Hunter EA & Gibbs JP (2014) Densities of ecological replacement herbivores required to restore plant communities: A case study of giant tortoises on Pinta Island, Galápagos. <i>Restoration Ecology</i> 22(2):248-256. | Google Scholar | NA  | NA  | Pro | Non-experimental empirical | Galapagos        |
| 39 | Hutton I, Parkes JP & Sinclair ARE (2007) Reassembling island ecosystems: the case of Lord Howe Island. <i>Animal Conservation</i> 10:22-29.                                                                            | Google Scholar | Pro | Pro | Con | Essay/Opinion              | Lord Howe Island |
| 40 | Huynh HM (2011) Pleistocene rewilding is unsound conservation practice. <i>BioEssays</i> 33(2):100-102.                                                                                                                 | WoS/Scopus     | NA  | NA  | Con | Essay/Opinion              | North America    |
| 41 | Jeeves M (2006) Rewilding                                                                                                                                                                                               | WoS/Scopus     | Pro | NA  | NA  | Essay/Opinion              | Europe           |

|    |                                                                                                                                                                                                                          |            |         |         |         |               |                                  |
|----|--------------------------------------------------------------------------------------------------------------------------------------------------------------------------------------------------------------------------|------------|---------|---------|---------|---------------|----------------------------------|
|    | Middle England. <i>Ecos</i> 27(3-4):8-16.                                                                                                                                                                                |            |         |         |         |               | (England)                        |
| 42 | Ji SN, et al. (2013) Behavioural and physiological stress responses to transportation in a group of Przewalski's horses ( <i>Equus ferus przewalskii</i> ). <i>Journal of Animal and Plant Sciences</i> 23(4):1077-1084. | WoS/Scopus | Pro     | NA      | NA      | Experiment    | China                            |
| 43 | Jørgensen, D (2015) Rethinking rewilding. <i>Geoforum</i> , 10.1016/j.geoforum.2014.11.016                                                                                                                               | WoS/Scopus | Neutral | Neutral | Neutral | Review        | Whole world                      |
| 44 | Kaiser-Bunbury CN, Traveset A & Hansen DM (2010) Conservation and restoration of plant-animal mutualisms on oceanic islands. <i>Perspectives in Plant Ecology, Evolution and Systematics</i> 12(2): 131-143.             | WoS/Scopus | NA      | NA      | Pro     | Review        | Oceanic and para-oceanic islands |
| 45 | Kirby K (2004) Rewilding and the role of large herbivores. <i>Ecos</i> 25(3-4):59-62.                                                                                                                                    | WoS/Scopus | Pro     | NA      | NA      | Essay/Opinion | Europe (England)                 |
| 46 | Kirby K, Yannik R & Barr C (2006) Wilding (or re-wilding). <i>International Journal of Biodiversity Science and Management</i> 2(3):273-275.                                                                             | WoS/Scopus | NA      | NA      | NA      | Essay/Opinion | Europe (England)                 |
| 47 | Kitchener AC (2012) Re-wilding Ireland: restoring mammalian diversity or developing new mammalian communities? <i>Irish Naturalists' Journal</i> 30:4-13.                                                                | WoS/Scopus | Pro     | Pro     | Pro     | Essay/Opinion | Europe (Ireland)                 |

|    |                                                                                                                                                                                          |                |         |         |         |               |                       |
|----|------------------------------------------------------------------------------------------------------------------------------------------------------------------------------------------|----------------|---------|---------|---------|---------------|-----------------------|
| 48 | Kueffer C & Kaiser-Bunbury CN (2013) Reconciling conflicting perspectives for biodiversity conservation in the Anthropocene. <i>Frontiers in Ecology and the Environment</i> 12:131-137. | Google Scholar | Pro     | Pro     | NA      | Essay/Opinion | Oceanic islands       |
| 49 | Lee WG, Wood JR & Rogers GM (2010) Legacy of avian-dominated plant–herbivore systems in New Zealand. <i>New Zealand Journal of Ecology</i> 34(1):28-47.                                  | Google Scholar | NA      | NA      | Pro     | Essay/Opinion | New Zealand           |
| 50 | Lindon A & Root-Bernstein M (2015) Phoenix flagships: Conservation values and guanaco reintroduction in an anthropogenic landscape. <i>Ambio</i> 44(5):458-471. <sup>2</sup>             | WoS/Scopus     | Pro     | NA      | NA      | Essay/Opinion | South America (Chile) |
| 51 | Lockwood JA (2010) The fate of the Rocky Mountain locust, <i>Melanoplus spretus</i> Walsh: implications for conservation biology. <i>Terrestrial Arthropod Reviews</i> 3(2):129-160.     | WoS/Scopus     | Neutral | Neutral | Neutral | Essay/Opinion | North America         |
| 52 | Lorimer J & Driessen C (2013) Bovine biopolitics and the promise of monsters in the rewilding of Heck cattle. <i>Geoforum</i> 48:249-259.                                                | WoS/Scopus     | Pro     | NA      | NA      | Essay/Opinion | Europe (Holland)      |
| 53 | Lorimer J & Driessen C (2014) Wild experiments at the Oostvaardersplassen: Rethinking environmentalism in the                                                                            | WoS/Scopus     | Pro     | NA      | NA      | Essay/Opinion | Europe (Holland)      |

<sup>2</sup> This article was Early View in 2014

Anthropocene. *Transactions of the Institute of British Geographers* 39(2):169-181.

|    |                                                                                                                                                                                                                               |                |     |     |     |               |                              |
|----|-------------------------------------------------------------------------------------------------------------------------------------------------------------------------------------------------------------------------------|----------------|-----|-----|-----|---------------|------------------------------|
| 54 | Louys J, Corlett RT, Price GJ, Hawkins S & Piper PJ (2014) Rewilding the tropics, and other conservation translocations strategies in the tropical Asia-Pacific region. <i>Ecology and Evolution</i> 4(22): 4380-4398.        | WoS/Scopus     | Pro | Pro | Pro | Essay/Opinion | Tropical Asia-Pacific region |
| 55 | Miskelly CM, Charteris MR & Fraser JR (2012) Successful translocation of Snares Island snipe ( <i>Coenocorypha huegeli</i> ) to replace the extinct South Island snipe ( <i>C. iredalei</i> ). <i>Notornis</i> 59(1-2):32-38. | WoS/Scopus     | NA  | NA  | Pro | Experiment    | New Zealand                  |
| 56 | Navarro LM & Pereira HM (2012) Rewilding abandoned landscapes in Europe. <i>Ecosystems</i> 15:900-912.                                                                                                                        | WoS/Scopus     | Pro | NA  | NA  | Essay/Opinion | Europe                       |
| 57 | Noss, R.F. (2003). A checklist for wildlands network designs. <i>Conservation Biology</i> 17(5):1270-1275.                                                                                                                    | WoS/Scopus     | Pro | NA  | NA  | Essay/Opinion | North America                |
| 58 | Oliveira-Santos LGR & Fernandez FAS (2010) Pleistocene rewilding, Frankenstein ecosystems, and an alternative conservation agenda. <i>Conservation Biology</i> 24(1):4-5.                                                     | WoS/Scopus     | Pro | Pro | Con | Essay/Opinion | Americas                     |
| 59 | Parker KA, Seabrook-Davison M & Ewen JG (2010) Opportunities                                                                                                                                                                  | Google Scholar | NA  | NA  | Pro | Essay/Opinion | New Zealand                  |

for nonnative ecological replacements in ecosystem restoration. *Restoration Ecology* 18(3):269-273.

|    |                                                                                                                                                                                             |                |         |         |         |                            |                        |
|----|---------------------------------------------------------------------------------------------------------------------------------------------------------------------------------------------|----------------|---------|---------|---------|----------------------------|------------------------|
| 60 | Pedrono M, et al. (2013) Using a surviving lineage of Madagascar's vanished megafauna for ecological restoration. <i>Biological Conservation</i> 159: 501-506.                              | Google Scholar | NA      | NA      | Pro     | Essay/Opinion              | Madagascar             |
| 61 | Pires MM, et al. (2014) Reconstructing past ecological networks: The reconfiguration of seed-dispersal interactions after megafaunal extinction. <i>Oecologia</i> 175(4):1247-1256.         | WoS/Scopus     | NA      | NA      | NA      | Non-experimental empirical | South America (Brazil) |
| 62 | Pocklington D (2008) Industry soundings. <i>Environmental Law and Management</i> 20:379-380.                                                                                                | WoS/Scopus     | Con     | NA      | NA      | Essay/Opinion              | Europe (England)       |
| 63 | Price MRS (2011) Re-introductions in today's Arabian Peninsula: The first steps for a grander vision? <i>Zoology in the Middle East</i> 54(3):159-167.                                      | WoS/Scopus     | Pro     | NA      | NA      | Essay/Opinion              | Arabian Peninsula      |
| 64 | Reardon S (2014) Rewilding: The next big thing? <i>New Scientist</i> 221(2958):40-43.                                                                                                       | WoS/Scopus     | Neutral | Neutral | Neutral | Essay/Opinion              | Hawaii                 |
| 65 | Richmond OM, McEntee JP, Hijmans RJ & Brashares JS (2010) Is the climate right for Pleistocene rewilding? Using species distribution models to extrapolate climatic suitability for mammals | WoS/Scopus     | NA      | NA      | Neutral | Non-experimental empirical | North America          |

|    |                                                                                                                                                                                                           |            |     |     |         |               |                                       |
|----|-----------------------------------------------------------------------------------------------------------------------------------------------------------------------------------------------------------|------------|-----|-----|---------|---------------|---------------------------------------|
|    | across continents. <i>PLoS One</i> 5(9):e12899.                                                                                                                                                           |            |     |     |         |               |                                       |
| 66 | Robbins P & Moore SA (2013) Ecological anxiety disorder: Diagnosing the politics of the Anthropocene. <i>Cultural Geographies</i> 20(1):3-19.                                                             | WoS/Scopus | NA  | NA  | Neutral | Essay/Opinion | Mascarene islands                     |
| 67 | Rubenstein D, Sherman P, Rubenstein D & Caro T (2007) Rewilding rebuttal. <i>Scientific American</i> 297(4):12.                                                                                           | WoS/Scopus | Pro | Pro | Con     | Essay/Opinion | North America                         |
| 68 | Rubenstein DR, Rubenstein DI, Sherman PW & Gavin TA (2006) Pleistocene Park: Does re-wilding North America represent sound conservation for the 21st century? <i>Biological Conservation</i> 132:232-238. | WoS/Scopus | Pro | NA  | Con     | Essay/Opinion | North America (Western North America) |
| 69 | Ruxton GD & Schaefer HM (2012) The conservation physiology of seed dispersal. <i>Philosophical Transactions of the Royal Society B: Biological Sciences</i> 367(1596):1708-1718.                          | WoS/Scopus | NA  | NA  | Pro     | Essay/Opinion | Islands (in particular)               |
| 70 | Sandom CJ, Hughes J & Macdonald DW (2013) Rooting for rewilding: Quantifying wild boar's <i>Sus scrofa</i> rooting rate in the scottish highlands. <i>Restoration Ecology</i> 21(3):329-335.              | WoS/Scopus | Pro | NA  | NA      | Experiment    | Europe (Scotland)                     |
| 71 | Sandom CJ, Hughes J & Macdonald DW (2013) Rewilding                                                                                                                                                       | WoS/Scopus | Pro | NA  | NA      | Experiment    | Europe (Scotland)                     |

|    |                                                                                                                                                                                                                                                          |            |     |     |     |                            |                                 |  |
|----|----------------------------------------------------------------------------------------------------------------------------------------------------------------------------------------------------------------------------------------------------------|------------|-----|-----|-----|----------------------------|---------------------------------|--|
|    | the Scottish highlands: Do wild boar, <i>Sus scrofa</i> , use a suitable foraging strategy to be effective ecosystem engineers? <i>Restoration Ecology</i> 21(3):336-343.                                                                                |            |     |     |     |                            |                                 |  |
| 72 | Sandom CJ, Ejrnæs R, Hansen, MDD & Svenning, JC (2014) High herbivore density associated with vegetation diversity in interglacial ecosystems. <i>Proceedings of the National Academy of Sciences of the United States of America</i> 111(11):4162-4167. | WoS/Scopus | Pro | Pro | Pro | Non-experimental empirical | Europe (Great Britain)          |  |
| 73 | Schlaepfer MA (2005) Re-wilding: A bold plan that needs native megafauna. <i>Nature</i> 437:951                                                                                                                                                          | WoS/Scopus | Pro | NA  | Con | Essay/Opinion              | North America                   |  |
| 74 | Seddon PJ, Moehrenschrager A & Ewen J (2014) Reintroducing resurrected species: Selecting DeExtinction candidates. <i>Trends in Ecology and Evolution</i> 29(3):140-147.                                                                                 | WoS/Scopus | Pro | NA  | NA  | Essay/Opinion              | North America, China, Australia |  |
| 75 | Seddon PJ, Griffiths CJ, Soorae PS & Armstrong DP (2014) Reversing defaunation: Restoring species in a changing world. <i>Science</i> 345(6195):406-412.                                                                                                 | WoS/Scopus | Pro | Pro | Pro | Essay/Opinion              | Whole world                     |  |
| 76 | Shay S (2005) Re-wilding: Don't overlook humans living on the plains. <i>Nature</i> 437(7058):476.                                                                                                                                                       | WoS/Scopus | Pro | NA  | Con | Essay/Opinion              | North America                   |  |
| 77 | Sims NK, John EA & Stewart AJ                                                                                                                                                                                                                            | Google     | Pro | NA  | NA  | Experiment                 | Europe                          |  |

|    |                                                                                                                                                                                                                                  |                |     |    |     |               |                  |
|----|----------------------------------------------------------------------------------------------------------------------------------------------------------------------------------------------------------------------------------|----------------|-----|----|-----|---------------|------------------|
|    | (2014) Short-term response and recovery of bluebells ( <i>Hyacinthoides non-scripta</i> ) after rooting by wild boar ( <i>Sus scrofa</i> ). <i>Plant Ecology</i> 215:1409-1416.                                                  | Scholar        |     |    |     |               | (England)        |
| 78 | Smit C, Ruifrok JL, van Klink R & Olf H (2015) Rewilding with large herbivores: The importance of grazing refuges for sapling establishment and wood-pasture formation. <i>Biological Conservation</i> 182:134-142. <sup>3</sup> | WoS/Scopus     | NA  | NA | NA  | Essay/Opinion | Europe (Holland) |
| 79 | Smith CI (2005) Re-wilding: Introductions could reduce biodiversity. <i>Nature</i> 437:318.                                                                                                                                      | WoS/Scopus     | NA  | NA | Con | Essay/Opinion | North America    |
| 80 | Stolzenburg W (2006) Where the wild things were. <i>Conservation in Practice</i> 7(1):28-33.                                                                                                                                     | Google Scholar | NA  | NA | NA  | Essay/Opinion | North America    |
| 81 | Tanentzap AJ, Lee WG & Monks A (2013) Increased nitrogen cycling facilitates native forest regeneration: Potential for restoring extinct ecological processes? <i>Ecological Applications</i> 23:36-45.                          | Google Scholar | NA  | NA | Pro | Experiment    | New Zealand      |
| 82 | Taylor P (2006) Home counties wildland - The new nature at Knepp. <i>Ecos</i> 27(3-4):44-51.                                                                                                                                     | WoS/Scopus     | Pro | NA | NA  | Essay/Opinion | Europe (England) |
| 83 | Taylor P (2009) Rewilding the political landscape. <i>Ecos</i> 30(3-                                                                                                                                                             | WoS/Scopus     | Pro | NA | NA  | Essay/Opinion | Europe (Great    |

<sup>3</sup> This article was Early View in 2014



|    |                                                                                                                                                                                                                   |                |         |     |         |               |                   |
|----|-------------------------------------------------------------------------------------------------------------------------------------------------------------------------------------------------------------------|----------------|---------|-----|---------|---------------|-------------------|
|    | 4):78-84.                                                                                                                                                                                                         |                |         |     |         |               | Britain)          |
| 84 | Toledo D, Agudelo MS & Bentley AL (2011) The shifting of ecological restoration benchmarks and their social impacts: Digging deeper into Pleistocene re-wilding. <i>Restoration Ecology</i> 19(5):564-568.        | WoS/Scopus     | Pro     | NA  | Con     | Essay/Opinion | North America     |
| 85 | Truett J & Phillips M (2009) Beyond historic baselines: Restoring bolson tortoises to Pleistocene range. <i>Ecological Restoration</i> 27(2):144-151.                                                             | WoS/Scopus     | Pro     | Pro | NA      | Essay/Opinion | North America     |
| 86 | Waibel A, Griffiths CJ, Zuël N, Schmid B & Albrecht M (2012) Does a giant tortoise taxon substitute enhance seed germination of exotic fleshy-fruited plants? <i>Journal of Plant Ecology</i> 10.1093/jpe/rts003. | Google Scholar | NA      | NA  | Pro     | Experiment    | Mascarene islands |
| 87 | Whipple SD & Hoback WW (2012) A comparison of dung beetle ( <i>Coleoptera: Scarabaeidae</i> ) attraction to native and exotic mammal dung. <i>Environmental Entomology</i> 41(2):238-244.                         | WoS/Scopus     | Neutral | NA  | Neutral | Experiment    | North America     |
| 88 | Wolverton S (2010) The North American Pleistocene overkill hypothesis and the re-wilding debate. <i>Diversity and Distributions</i> 16(5):874-876.                                                                | WoS/Scopus     | NA      | NA  | Neutral | Essay/Opinion | North America     |
| 89 | Wood JR, et al. (2008) Coprolite                                                                                                                                                                                  | Google         | NA      | NA  | Pro     | Non-          | New               |

|    |                                                                                                                                                                                                                                                          |            |     |    |     |                            |                        |
|----|----------------------------------------------------------------------------------------------------------------------------------------------------------------------------------------------------------------------------------------------------------|------------|-----|----|-----|----------------------------|------------------------|
|    | deposits reveal the diet and ecology of the extinct New Zealand megaherbivore moa (Aves, Dinornithiformes). <i>Quaternary Science Reviews</i> 27(27-28): 2593-2602.                                                                                      | Scholar    |     |    |     | experimental empirical     | Zealand                |
| 90 | Wood JR, et al. (2013) Resolving lost herbivore community structure using coprolites of four sympatric moa species (Aves: Dinornithiformes). <i>Proceedings of the National Academy of Sciences of the United States of America</i> 110(42):16910-16915. | WoS/Scopus | NA  | NA | Pro | Non-experimental empirical | New Zealand            |
| 91 | Wynne-Jones S (2012). Heartlands and wildwoods. <i>Ecos</i> 33(1):15-20.                                                                                                                                                                                 | WoS/Scopus | Pro | NA | NA  | Essay/Opinion              | Europe (Great Britain) |

**Table S2:** Summary of rewilding projects mentioned in the articles used in the systematic review (*SI Appendix*, Table S1). These include initiatives fulfilling the criteria for trophic rewilding used in the systematic review (ecological restoration involving conservation translocations explicitly aimed to restore ecological function) as well as initiatives otherwise referred to as rewilding projects in the articles themselves. The species introduction column lists both already introduced taxa (including temporary experimental introductions) and, in parentheses, taxa that are only mentioned as candidates for future introductions.

| Geographic location | Name                                                                                           | Species introductions                                                                                                                  | Publications (cf. <i>SI Appendix</i> , Table S1)                  |
|---------------------|------------------------------------------------------------------------------------------------|----------------------------------------------------------------------------------------------------------------------------------------|-------------------------------------------------------------------|
| Chile               | Nature Reserve<br>Altos de Cantillana,<br>central Chile (0.496<br>ha)                          | Guanaco                                                                                                                                | 50                                                                |
| England             | Knepp Estate, West<br>Sussex (1400ha)                                                          | Tamworths/red-brown pig,<br>English longhorn cattle,<br>fallow deer, Exmoor pony<br>(Heck cattle, beaver,<br>European bison, red deer) | 82                                                                |
| Europe              | Rewilding Europe<br>(10 areas, aiming to<br>reach 1,000,000 ha<br>in total)                    |                                                                                                                                        | 2, 35, 64                                                         |
| Galapagos           | Pinta Island (6000<br>ha), Floreana Island<br>(17,300 ha), and<br>Española island<br>(6000 ha) | Galapagos giant tortoise                                                                                                               | 25, 33                                                            |
| Hawaii              | Makawahi Cave<br>Reserve (6.9 ha)                                                              | African spurred tortoise                                                                                                               | 6, 64, 75                                                         |
| Holland             | Oostvaardersplassen<br>(5600 ha)                                                               | Konik horse, red deer, Heck<br>cattle (European bison, wild<br>boar)                                                                   | 2, 15, 35, 52, 53, 62, 64<br>75, 78, 82                           |
| Latvia              | Lake Pape (250 ha)                                                                             | Konik horse                                                                                                                            | 35                                                                |
| Madagascar          | Beanka Nature<br>Reserve (14,000 ha)                                                           | Aldabran tortoise                                                                                                                      | 33, 60                                                            |
| Mascarene Islands   | Ile aux Aigrettes<br>(25 ha), Round<br>Island (215 ha)<br>Rodrigues (19 ha)                    | Aldabran tortoise,<br>Madagascan radiated<br>tortoise                                                                                  | 11, 15, 24, 26, 27, 29,<br>32, 33, 44, 55, 60, 64,<br>66, 69, 86, |
| Mexico              | Palenque National<br>Park (1800 ha)                                                            | Scarlet macaw                                                                                                                          | 19                                                                |

|             |                                                                                                 |                                                    |                    |
|-------------|-------------------------------------------------------------------------------------------------|----------------------------------------------------|--------------------|
| New Zealand | Putauhinu Island<br>(141 ha)                                                                    | Snare Island snipe                                 | 55                 |
| Russia      | Pleistocene Park<br>(1600 ha)                                                                   | Yakutian horse, bison, musk<br>ox (Siberian tiger) | 12,15, 47, 64, 68  |
| Scotland    | Alladale Wilderness<br>Reserve (9300 ha -<br>attempt to achieve<br>20,000 ha fenced<br>reserve) | Wild boar                                          | 47, 70             |
| Scotland    | Knapdale Forest,<br>Argyll (19,800 ha)                                                          | Beaver                                             | 47                 |
| Scotland    | Trees for Life, Glen<br>Afric (260,000 ha)                                                      | None                                               | 20, 70             |
| Seychelles  | ~17 small islands<br>(maximum size: 460<br>ha)                                                  | Aldabran tortoise                                  | 24, 26, 33         |
| USA         | Yellowstone<br>National Park<br>(~900,000 ha)                                                   | Wolf                                               | 14, 15, 47, 62, 64 |
| USA         | Armendaris Ranch,<br>New Mexico<br>(~147000 ha)                                                 | Bolson tortoise                                    | 15, 18, 67, 85     |

**Table S3:** Species mentioned for rewilding in the articles used in the systematic review (*SI Appendix*, Table S1). Characteristics include organism group (invertebrates, reptiles, birds, and mammals; the latter is further divided according to diet), introduction geography (range restriction [extant within the focal zoogeographic region, but with reduced range], species extirpated <5000 years ago [extant species that have gone extinct within the focal region within the last 5000 years], species extinct >5000 years ago [extant species that have gone extinct within the focal region more than 5000 years ago], ecological replacement for a globally extinct species, and novel function [introduction to achieve novel ecological function]), body mass, and times since disappearance (partly present, 0-99 years ago, 100-499 years ago, 500-2000 years ago, 2000-5000 years ago, >5000 years ago, and never present).

| Species (latin name)          | Species (common name) | Reference ( <i>Appendix SI</i> , Table S1) | Source         | Organism group     | Introduction geography | Body mass (kg) | Time since disappearance (ya) |
|-------------------------------|-----------------------|--------------------------------------------|----------------|--------------------|------------------------|----------------|-------------------------------|
| <i>Acinonyx jubatus</i>       | Cheetah               | 15                                         | WoS/Scopus     | Carnivorous mammal | Ecological replacement | 10-49          | >5000                         |
| <i>Acinonyx jubatus</i>       | Cheetah               | 14                                         | WoS/Scopus     | Carnivorous mammal | Ecological replacement | 10-49          | >5000                         |
| <i>Aldabrachelys gigantea</i> | Aldabran tortoise     | 32                                         | WoS/Scopus     | Reptile            | Ecological replacement | 100-499        | 100-499                       |
| <i>Aldabrachelys gigantea</i> | Aldabran tortoise     | 33                                         | WoS/Scopus     | Reptile            | Ecological replacement | 100-499        | 500-1999                      |
| <i>Aldabrachelys gigantea</i> | Aldabran tortoise     | 33                                         | WoS/Scopus     | Reptile            | Range restricted       | 100-499        | Partly present                |
| <i>Aldabrachelys gigantea</i> | Aldabran tortoise     | 33                                         | WoS/Scopus     | Reptile            | Ecological replacement | 100-499        | 100-499                       |
| <i>Aldabrachelys gigantea</i> | Aldabran tortoise     | 26                                         | WoS/Scopus     | Reptile            | Ecological replacement | 100-499        | 100-499                       |
| <i>Aldabrachelys gigantea</i> | Aldabran tortoise     | 27                                         | WoS/Scopus     | Reptile            | Ecological replacement | 100-499        | 100-499                       |
| <i>Aldabrachelys gigantea</i> | Aldabran tortoise     | 29                                         | WoS/Scopus     | Reptile            | Ecological replacement | 100-499        | 100-499                       |
| <i>Aldabrachelys gigantea</i> | Aldabran tortoise     | 24                                         | Google Scholar | Reptile            | Range restricted       | 100-499        | Partly present                |
| <i>Aldabrachelys gigantea</i> | Aldabran tortoise     | 28                                         | Google Scholar | Reptile            | Ecological replacement | 100-499        | 100-499                       |

|                               |                              |    |                |                    |                        |         |                |
|-------------------------------|------------------------------|----|----------------|--------------------|------------------------|---------|----------------|
| <i>Aldabrachelys gigantea</i> | Aldabran tortoise            | 60 | Google Scholar | Reptile            | Ecological replacement | 100-499 | 500-1999       |
| <i>Aldabrachelys gigantea</i> | Aldabran tortoise            | 60 | Google Scholar | Reptile            | Ecological replacement | 100-499 | 500-1999       |
| <i>Aldabrachelys gigantea</i> | Aldabran tortoise            | 86 | Google Scholar | Reptile            | Ecological replacement | 100-499 | 100-499        |
| <i>Anas laysanensis</i>       | Laysan teal                  | 6  | Google Scholar | Bird               | Range restricted       | 0-9     | Partly present |
| <i>Ara macao cyanoptera</i>   | Scarlet Macaw                | 19 | WoS/Scopus     | Bird               | Range restricted       | 0-9     | Partly present |
| <i>Astrochelys radiata</i>    | Madagascan radiated tortoise | 33 | WoS/Scopus     | Reptile            | Ecological replacement | 10-49   | 100-499        |
| <i>Astrochelys radiata</i>    | Madagascan radiated tortoise | 26 | WoS/Scopus     | Reptile            | Ecological replacement | 10-49   | 100-499        |
| <i>Astrochelys radiata</i>    | Madagascan radiated tortoise | 29 | WoS/Scopus     | Reptile            | Ecological replacement | 10-49   | 100-499        |
| <i>Astrochelys radiata</i>    | Madagascan radiated tortoise | 28 | Google Scholar | Reptile            | Ecological replacement | 10-49   | 100-499        |
| <i>Axis calamianensis</i>     | Calamian Hog deer            | 54 | WoS/Scopus     | Herbivorous mammal | Range restricted       | 10-49   | Partly present |
| <i>Bison bison</i>            | American bison               | 12 | WoS/Scopus     | Herbivorous mammal | Extirpated <5000       | 500-999 | 500-1999       |
| <i>Bison bonasus</i>          | European bison               | 82 | WoS/Scopus     | Herbivorous mammal | Range restricted       | 500-999 | Partly present |
| <i>Bos primigenius</i>        | Aurochs/Heck cattle          | 82 | WoS/Scopus     | Herbivorous mammal | Extirpated <5000       | 500-999 | 500-1999       |
| <i>Buteo solitarius</i>       | Hawaiian hawk                | 6  | Google Scholar | Bird               | Range restricted       | 0-9     | Partly present |
| <i>Camelus bactrianus</i>     | Wild Bactrian camel          | 15 | WoS/Scopus     | Herbivorous mammal | Ecological replacement | 500-999 | >5000          |
| <i>Camelus bactrianus</i>     | Wild Bactrian camel          | 14 | WoS/Scopus     | Herbivorous mammal | Ecological replacement | 500-999 | >5000          |
| <i>Canis lupus</i>            | Wolf                         | 4  | WoS/Scopus     | Carnivorous mammal | Range restricted       | 10-49   | Partly present |

|                               |                          |    |                |                    |                        |         |                |
|-------------------------------|--------------------------|----|----------------|--------------------|------------------------|---------|----------------|
| <i>Canis lupus</i>            | Wolf                     | 20 | WoS/Scopus     | Carnivorous mammal | Range restricted       | 10-49   | Partly present |
| <i>Canis lupus</i>            | Wolf                     | 47 | WoS/Scopus     | Carnivorous mammal | Range restricted       | 10-49   | Partly present |
| <i>Canis lupus dingo</i>      | Dingo                    | 34 | WoS/Scopus     | Carnivorous mammal | Ecological replacement | 10-49   | 0-99           |
| <i>Canis lupus dingo</i>      | Dingo                    | 3  | Google Scholar | Carnivorous mammal | Ecological replacement | 10-49   | 0-99           |
| <i>Castor fiber</i>           | Beaver                   | 4  | WoS/Scopus     | Herbivorous mammal | Range restricted       | 10-49   | Partly present |
| <i>Castor fiber</i>           | Beaver                   | 20 | WoS/Scopus     | Herbivorous mammal | Range restricted       | 10-49   | Partly present |
| <i>Castor fiber</i>           | Beaver                   | 82 | WoS/Scopus     | Herbivorous mammal | Range restricted       | 10-49   | Partly present |
| <i>Castor fiber</i>           | Beaver                   | 47 | WoS/Scopus     | Herbivorous mammal | Range restricted       | 10-49   | Partly present |
| <i>Centrochelys sulcata</i>   | African spurred tortoise | 64 | WoS/Scopus     | Reptile            | Ecological replacement | 50-99   | 500-1999       |
| <i>Cervus elaphus</i>         | Red deer (elk/wapiti)    | 4  | WoS/Scopus     | Herbivorous mammal | Range restricted       | 100-499 | Partly present |
| <i>Cervus elaphus</i>         | Red deer (elk/wapiti)    | 82 | WoS/Scopus     | Herbivorous mammal | Range restricted       | 100-499 | Partly present |
| <i>Chelonoidis carbonaria</i> | Red-footed tortoise      | 33 | WoS/Scopus     | Reptile            | Ecological replacement | 0-9     | 1999-5000      |
| <i>Chelonoidis nigra</i>      | Galapagos giant tortoise | 25 | Google Scholar | Reptile            | Range restricted       | 50-99   | Partly present |
| <i>Chelonoidis nigra</i>      | Galapagos giant tortoise | 38 | Google Scholar | Reptile            | Range restricted       | 50-99   | Partly present |
| <i>Chelonoidis nigra</i>      | Galapagos giant tortoise | 37 | Google Scholar | Reptile            | Range restricted       | 50-99   | Partly present |
| <i>Chelonoidis nigra</i>      | Galapagos giant tortoise | 33 | WoS/Scopus     | Reptile            | Range restricted       | 50-99   | Partly present |
| <i>Chelonoidis nigra</i>      | Galapagos giant          | 33 | WoS/Scopus     | Reptile            | Range                  | 50-99   | Partly present |

|                                 |                                      |    |                |                    |                                      |             |                |
|---------------------------------|--------------------------------------|----|----------------|--------------------|--------------------------------------|-------------|----------------|
| <i>Chelonoidis nigra</i>        | tortoise<br>Galapagos giant tortoise | 54 | WoS/Scopus     | Reptile            | restricted<br>Ecological replacement | 50-99       | 1999-5000      |
| <i>Coenocorypha huegeli</i>     | Snares island nipe                   | 55 | WoS/Scopus     | Bird               | Ecological replacement               | 0-9         | 0-99           |
| <i>Coturnix ypsilophora</i>     | Australian brown quail               | 59 | Google Scholar | Bird               | Ecological replacement               | 0-9         | 100-499        |
| <i>Dicerorhinus sumatrensis</i> | Sumatra rhinoceros                   | 54 | WoS/Scopus     | Herbivorous mammal | Range restricted                     | $\geq 1000$ | Partly present |
| <i>Elephas maximus</i>          | Asian elephant                       | 15 | WoS/Scopus     | Herbivorous mammal | Ecological replacement               | $\geq 1000$ | >5000          |
| <i>Elephas maximus</i>          | Asian elephant                       | 14 | WoS/Scopus     | Herbivorous mammal | Ecological replacement               | $\geq 1000$ | >5000          |
| <i>Elephas maximus</i>          | Asian elephant                       | 54 | WoS/Scopus     | Herbivorous mammal | Range restricted                     | $\geq 1000$ | Partly present |
| <i>Elephas maximus</i>          | Asian elephant                       | 54 | WoS/Scopus     | Herbivorous mammal | Ecological replacement               | $\geq 1000$ | >5000          |
| <i>Equus africanus asinus</i>   | Burro                                | 16 | Google Scholar | Herbivorous mammal | Ecological replacement               | 100-499     | >5000          |
| <i>Equus ferus</i>              | Yakutian horse                       | 12 | WoS/Scopus     | Herbivorous mammal | Extirpated <5000                     | 100-499     | 1999-5000      |
| <i>Equus ferus przewalskii</i>  | Przewalski horse                     | 16 | Google Scholar | Herbivorous mammal | Extirpated >5000                     | 100-499     | >5000          |
| <i>Equus ferus przewalskii</i>  | Przewalski horse                     | 15 | WoS/Scopus     | Herbivorous mammal | Extirpated >5000                     | 100-499     | >5000          |
| <i>Equus ferus przewalskii</i>  | Przewalski horse                     | 14 | WoS/Scopus     | Herbivorous mammal | Extirpated >5000                     | 100-499     | >5000          |
| <i>Equus ferus przewalskii</i>  | Przewalski horse                     | 42 | WoS/Scopus     | Herbivorous mammal | Range restricted                     | 100-499     | 0-99           |
| <i>Equus hemionus</i>           | Asian wild ass                       | 15 | WoS/Scopus     | Herbivorous mammal | Ecological replacement               | 100-499     | >5000          |
| <i>Equus hemionus</i>           | Asian wild ass                       | 14 | WoS/Scopus     | Herbivorous mammal | Ecological replacement               | 100-499     | >5000          |
| <i>Felis silvestris</i>         | European wildcat                     | 4  | WoS/Scopus     | Carnivorous        | Range                                | 0-9         | Partly present |



|                                 |                       |    |                   |                        |                           |         |                |
|---------------------------------|-----------------------|----|-------------------|------------------------|---------------------------|---------|----------------|
| <i>Felis silvestris</i>         | European wildcat      | 82 | WoS/Scopus        | mammal<br>Carnivorous  | restricted<br>Range       | 0-9     | Partly present |
| <i>Geograpsus geayi</i>         | Land crab             | 6  | Google<br>Scholar | mammal<br>Invertebrate | restricted<br>Range       | 0-9     | Partly present |
| <i>Glaucopsyche xerces</i>      | Xerces blue butterfly | 74 | WoS/Scopus        | Invertebrate           | Extirpated<br><5000       | 0-9     | 0-99           |
| <i>Gopherus flavomarginatus</i> | Bolson tortoise       | 15 | WoS/Scopus        | Reptile                | Extirpated<br>>5000       | 10-49   | >5000          |
| <i>Gopherus flavomarginatus</i> | Bolson tortoise       | 14 | WoS/Scopus        | Reptile                | Extirpated<br>>5000       | 10-49   | >5000          |
| <i>Gopherus flavomarginatus</i> | Bolson tortoise       | 18 | WoS/Scopus        | Reptile                | Range<br>restricted       | 10-49   | Partly present |
| <i>Lama guanicoe</i>            | Guanaco               | 50 | WoS/Scopus        | Herbivorous<br>mammal  | Range<br>restricted       | 100-499 | Partly present |
| <i>Loxodonta africana</i>       | African elephant      | 15 | WoS/Scopus        | Herbivorous<br>mammal  | Ecological<br>replacement | ≥ 1000  | >5000          |
| <i>Loxodonta africana</i>       | African elephant      | 14 | WoS/Scopus        | Herbivorous<br>mammal  | Ecological<br>replacement | ≥ 1000  | >5000          |
| <i>Loxodonta africana (?)</i>   | African elephant (?)  | 3  | Google<br>Scholar | Herbivorous<br>mammal  | Novel<br>function         | ≥ 1000  | Never present  |
| <i>Lutra lutra</i>              | European otter        | 82 | WoS/Scopus        | Carnivorous<br>mammal  | Range<br>restricted       | 0-9     | Partly present |
| <i>Lynx lynx</i>                | Eurasian lynx         | 4  | WoS/Scopus        | Carnivorous<br>mammal  | Range<br>restricted       | 10-49   | Partly present |
| <i>Lynx lynx</i>                | Eurasian lynx         | 20 | WoS/Scopus        | Carnivorous<br>mammal  | Range<br>restricted       | 10-49   | Partly present |
| <i>Lynx lynx</i>                | Eurasian lynx         | 83 | WoS/Scopus        | Carnivorous<br>mammal  | Range<br>restricted       | 10-49   | Partly present |
| <i>Lynx lynx</i>                | Eurasian lynx         | 82 | WoS/Scopus        | Carnivorous<br>mammal  | Range<br>restricted       | 10-49   | Partly present |
| <i>Melanoplus spretus</i>       | Rocky mountain locust | 51 | WoS/Scopus        | Invertebrate           | Extirpated<br><5000       | 0-9     | 100-499        |
| <i>Mustela putorius</i>         | European polecat      | 4  | WoS/Scopus        | Carnivorous            | Range                     | 0-9     | Partly present |

|                                |                    |    |                |                       |                           |         |                |
|--------------------------------|--------------------|----|----------------|-----------------------|---------------------------|---------|----------------|
| <i>Ovibos moschatus</i>        | Muskox             | 12 | WoS/Scopus     | mammal<br>Herbivorous | restricted<br>Ecological  | 100-499 | 1999-5000      |
| <i>Panthera leo persica</i>    | Asiatic lion       | 15 | WoS/Scopus     | mammal<br>Carnivorous | replacement<br>Ecological | 100-499 | >5000          |
| <i>Panthera leo persica</i>    | Asiatic lion       | 14 | WoS/Scopus     | mammal<br>Carnivorous | replacement<br>Ecological | 100-499 | >5000          |
| <i>Panthera tigris</i>         | Tiger              | 54 | WoS/Scopus     | mammal<br>Carnivorous | restricted<br>Range       | 100-499 | Partly present |
| <i>Panthera tigris altaica</i> | Amur tiger         | 17 | Google Scholar | mammal<br>Carnivorous | restricted<br>Range       | 100-499 | Partly present |
| <i>Pongo abelii</i>            | Sumatran orangutan | 54 | WoS/Scopus     | mammal<br>Omnivorous  | restricted<br>Range       | 50-99   | Partly present |
| <i>Pongo pygmaeus</i>          | Bornean orangutan  | 54 | WoS/Scopus     | mammal<br>Omnivorous  | restricted<br>Range       | 50-99   | Partly present |
| <i>Rhinoceros sondaicus</i>    | Javan rhinoceros   | 54 | WoS/Scopus     | mammal<br>Herbivorous | restricted<br>Range       | ≥ 1000  | Partly present |
| <i>Rhinoceros unicornis</i>    | Indian rhinoceros  | 54 | WoS/Scopus     | mammal<br>Herbivorous | restricted<br>Range       | ≥ 1000  | Partly present |
| <i>Sarcophilus harrisii</i>    | Tasmanian devil    | 54 | WoS/Scopus     | mammal<br>Carnivorous | restricted<br>Range       | 10-49   | Partly present |
| <i>Sus scrofa</i>              | Wild boar          | 4  | WoS/Scopus     | mammal<br>Omnivorous  | restricted<br>Range       | 100-499 | Partly present |
| <i>Sus scrofa</i>              | Wild boar          | 20 | WoS/Scopus     | mammal<br>Omnivorous  | restricted<br>Range       | 100-499 | Partly present |
| <i>Sus scrofa</i>              | Wild boar          | 82 | WoS/Scopus     | mammal<br>Omnivorous  | restricted<br>Range       | 100-499 | Partly present |
| <i>Sus scrofa</i>              | Wild boar          | 70 | WoS/Scopus     | mammal<br>Omnivorous  | restricted<br>Range       | 100-499 | Partly present |
| <i>Sus scrofa</i>              | Wild boar          | 71 | WoS/Scopus     | mammal<br>Omnivorous  | restricted<br>Range       | 100-499 | Partly present |
| <i>Sus scrofa</i>              | Wild boar          | 77 | Google Scholar | mammal<br>Omnivorous  | restricted<br>Range       | 100-499 | Partly present |
| <i>Tapirus indicus</i>         | Malayan tapir      | 54 | WoS/Scopus     | Herbivorous           | Range                     | 100-499 | Partly present |

|                                |                                 |    |                |                              |                                   |         |                |
|--------------------------------|---------------------------------|----|----------------|------------------------------|-----------------------------------|---------|----------------|
| <i>Thylacinus cynocephalus</i> | Thylacine                       | 74 | WoS/Scopus     | mammal<br>Carnivorous mammal | restricted<br>Extirpated<br><5000 | 10-49   | 0-99           |
| <i>Ursus arctos</i>            | Brown bear                      | 4  | WoS/Scopus     | Omnivorous mammal            | Range restricted                  | 100-499 | Partly present |
| <i>Ursus arctos</i>            | Brown bear                      | 20 | WoS/Scopus     | Omnivorous mammal            | Range restricted                  | 100-499 | Partly present |
| <i>Varanus komodoensis</i>     | Komodo dragon                   | 3  | Google Scholar | Reptile                      | Ecological replacement            | 100-499 | >5000          |
| <i>Zaglossus attenboroughi</i> | Sir David's long-beaked echidna | 54 | WoS/Scopus     | Carnivorous mammal           | Range restricted                  | 0-9     | Partly present |
| <i>Zaglossus bartoni</i>       | Eastern long-beaked echidna     | 54 | WoS/Scopus     | Carnivorous mammal           | Range restricted                  | 0-9     | Partly present |
| <i>Zaglossus bruijini</i>      | Western long-beaked echidna     | 54 | WoS/Scopus     | Carnivorous mammal           | Range restricted                  | 10-49   | Partly present |

---
